# Supplementary material for: Impact of chlorine dioxide disinfection of irrigation water on the epiphytic bacterial community of baby spinach and underlying soil
Source: PubMed Central journal article supplement (PMC6051574; doi:10.1371/journal.pone.0199291), 2018-07-18
Supplement: pone.0199291.s002.pdf [file pone.0199291.s002.pdf]

|                                | IW        | IW-CIO <sub>2</sub> | Soil       | Soil-CIO <sub>2</sub> | Crop       | Crop-CIO <sub>2</sub> |
|--------------------------------|-----------|---------------------|------------|-----------------------|------------|-----------------------|
| <i>Acetobacteraceae</i>        | 1.46±0.50 | 3.18±0.64           |            |                       |            |                       |
| <i>Aeromonadaceae</i>          |           |                     |            |                       | 0.30±0.01  | 0.10±0.07             |
| <i>Alcaligenaceae</i>          | 1.37±0.35 | 1.33±0.67           |            |                       |            |                       |
| <i>Alteromonadaceae</i>        |           |                     |            |                       | 0.82±0.20  | 0.35±0.03             |
| <i>Bacillaceae</i>             | 0.89±0.34 | 2.69±0.76           | 13.49±1.45 | 14.29±1.37            | 12.79±3.76 | 14.86±3.10            |
| <i>Bifidobacteriaceae</i>      | 2.76±1.10 | 3.03±0.88           |            |                       |            |                       |
| <i>Brocadiaceae</i>            | 1.01±0.64 | 1.93±0.53           |            |                       |            |                       |
| <i>Campylobacteraceae</i>      | 4.07±0.66 | 13.50±5.69          |            |                       |            |                       |
| <i>Caulobacteraceae</i>        | 1.45±0.25 | 1.12±0.33           |            |                       |            |                       |
| <i>Caulobacteraceae</i>        |           |                     |            |                       | 0.81±0.59  | 0.80±0.55             |
| <i>Cellulomonadaceae</i>       | 2.59±1.42 | 4.04±0.52           | 0.83±0.05  | 0.87±0.13             | 0.75±0.30  | 0.80±0.39             |
| <i>Chitinophagaceae</i>        | 0.90±0.18 | 1.34±0.29           |            |                       |            |                       |
| <i>Chromatiaceae</i>           | 0.95±0.55 | 0.70±0.57           |            |                       | 0.87±0.09  | 0.57±0.04             |
| <i>Chthoniobacterales</i>      | 1.42±0.25 | 0.95±0.20           |            |                       |            |                       |
| <i>Clostridiaceae</i>          |           |                     |            |                       | 0.91±0.47  | 1.25±0.11             |
| <i>Comamonadaceae</i>          | 4.61±1.78 | 5.97±1.43           | 1.31±0.17  | 0.52±0.11             | 2.53±0.60  | 1.86±0.76             |
| <i>Conexibacteraceae</i>       |           |                     | 1.45±0.16  | 1.33±0.22             |            |                       |
| <i>Cryomorphaceae</i>          | 0.37±0.21 | 0.95±0.24           |            |                       |            |                       |
| <i>Desulfobacteraceae</i>      | 0.90±0.27 | 0.73±0.24           |            |                       |            |                       |
| <i>Desulfovibrionaceae</i>     |           |                     | 1.06±0.13  | 1.04±0.14             |            |                       |
| <i>Desulfuromonadaceae</i>     |           |                     |            |                       | 0.87±0.79  | 0.89±0.75             |
| <i>Dethiosulfovibrionaceae</i> | 5.20±1.88 | 2.58±0.84           |            |                       |            |                       |
| <i>Enterobacteriaceae</i>      |           |                     |            |                       | 0.95±0.08  | 0.37±0.05             |
| <i>Enterococcaceae</i>         | 1.04±0.56 | 0.69±0.31           |            |                       |            |                       |
| <i>Erythrobacteraceae</i>      |           |                     |            |                       | 0.38±0.27  | 0.37±0.36             |
| <i>Flavobacteriaceae</i>       | 2.12±0.58 | 2.58±0.42           | 0.73±0.15  | 1.04±0.61             | 1.36±0.11  | 0.77±0.57             |
| <i>Flexibacteraceae</i>        |           |                     | 1.44±0.19  | 1.00±0.20             | 0.91±0.46  | 0.71±0.24             |
| <i>Geodermatophilaceae</i>     |           |                     |            |                       | 0.90±0.17  | 0.97±0.34             |
| <i>Heliobacteriaceae</i>       |           |                     |            |                       | 4.05±1.84  | 4.32±1.90             |
| <i>Hyphomicrobiaceae</i>       |           |                     | 0.79±0.09  | 0.97±0.17             | 0.69±0.46  | 0.76±0.47             |
| <i>Methylophilaceae</i>        |           |                     |            |                       | 0.69±0.06  | 0.49±0.05             |
| <i>Microbacteriaceae</i>       |           |                     | 0.91±0.11  | 0.94±0.16             | 0.83±0.38  | 0.76±0.45             |
| <i>Micrococcaceae</i>          |           |                     | 9.72±1.35  | 9.81±2.59             | 3.23±1.16  | 3.18±1.58             |
| <i>Micromonosporaceae</i>      |           |                     | 1.14±0.23  | 1.28±0.26             |            |                       |
| <i>Moraxellaceae</i>           | 1.72±0.20 | 0.62±0.24           |            |                       | 1.15±0.79  | 2.59±0.58             |

|                                |           |           |            |            |           |           |
|--------------------------------|-----------|-----------|------------|------------|-----------|-----------|
| <i>Mycobacteriaceae</i>        | 1.33±0.56 | 0.33±0.18 |            |            |           |           |
| <i>Mycoplasmataceae</i>        | 0.90±0.17 | 1.67±0.40 |            |            |           |           |
| <i>Nocardioideaceae</i>        | 1.04±0.34 | 0.69±0.14 | 10.38±0.61 | 10.02±0.74 | 3.85±0.81 | 3.61±0.25 |
| <i>Oxalobacteraceae</i>        | 1.03±0.51 | 1.34±0.61 |            |            | 0.81±0.62 | 0.60±0.29 |
| <i>Paenibacillaceae</i>        | 0.39±0.05 | 1.32±0.06 | 2.54±0.20  | 2.73±0.25  | 2.20±0.64 | 2.47±0.65 |
| <i>Phyllobacteriaceae</i>      |           |           |            |            | 0.72±0.57 | 0.81±0.69 |
| <i>Piscirickettsiaceae</i>     |           |           |            |            | 0.34±0.32 | 0.74±0.83 |
| <i>Planococcaceae</i>          |           |           |            |            | 2.17±1.80 | 4.14±1.87 |
| <i>Pseudomonadaceae</i>        | 1.20±0.33 | 0.39±0.19 |            |            | 7.96±4.59 | 3.47±3.60 |
| <i>Pseudonocardiaceae</i>      | 4.83±1.06 | 2.17±0.57 | 3.68±0.31  | 4.06±0.22  | 1.60±0.52 | 1.82±0.80 |
| <i>Rhizobiaceae</i>            | 0.77±0.07 | 0.94±0.09 |            |            | 0.84±0.13 | 0.65±0.50 |
| <i>Rhodobacteraceae</i>        | 2.22±0.57 | 1.46±0.52 | 1.34±0.16  | 1.36±0.31  | 1.78±0.68 | 2.13±0.62 |
| <i>Rhodospirillaceae</i>       | 0.94±0.05 | 1.00±0.48 | 3.99±0.54  | 3.62±0.62  | 1.96±0.83 | 2.02±1.15 |
| <i>Rickettsiaceae</i>          | 1.62±0.55 | 2.07±0.98 |            |            | 2.51±0.07 | 3.08±0.05 |
| <i>Saprospiraceae</i>          | 4.70±1.13 | 3.78±0.78 |            |            |           |           |
| <i>Sphingobacteriaceae</i>     | 0.81±0.08 | 0.93±0.17 |            |            | 0.89±0.18 | 0.23±0.02 |
| <i>Sphingomonadaceae</i>       | 3.17±0.21 | 1.12±0.27 | 3.15±0.16  | 3.13±0.35  | 4.51±1.12 | 4.83±1.75 |
| <i>Staphylococcaceae</i>       | 0.13±0.02 | 0.51±0.06 |            |            |           |           |
| <i>Streptomycetaceae</i>       |           |           | 7.21±1.44  | 7.30±1.43  | 1.52±0.66 | 1.62±0.65 |
| <i>Streptosporangiaceae</i>    |           |           | 0.75±0.15  | 0.67±0.11  |           |           |
| <i>Thermoactinomycetaceae</i>  |           |           | 1.21±0.11  | 1.50±0.22  | 1.17±0.47 | 1.19±0.37 |
| <i>Thermoanaerobacteraceae</i> |           |           | 1.17±0.11  | 1.29±0.09  |           |           |
| <i>Thermogemmatissporaceae</i> | 8.78±3.82 | 7.85±5.22 |            |            | 3.02±0.67 | 3.17±0.74 |
| <i>Thermomonosporaceae</i>     |           |           | 0.88±0.11  | 0.91±0.09  |           |           |
| <i>Verrucomicrobiaceae</i>     | 4.15±0.82 | 2.56±0.41 |            |            |           |           |
| <i>Xanthomonadaceae</i>        |           |           | 1.84±0.12  | 2.05±0.38  | 2.16±0.78 | 2.07±0.91 |

2

3
